# Supplementary material for: Manipulating triplet states: tuning energies, absorption, lifetimes, and annihilation rates in anthanthrene derivatives
Source: Royal Society of Chemistry journal article supplement (doi:10.1039/c8cp06048g), 2018-01-01
Supplement: c8cp06048g1.pdf [file c8cp06048g1.pdf]

## Supporting Information

### Manipulating Triplet States: Tuning Energies, Absorption, Lifetimes, and Annihilation Rates in Anthanthrene Derivatives

*David J. Stewart,<sup>\*a,b</sup> Jianmin Shi,<sup>c</sup> Tristan R. Naranjo,<sup>a,d</sup> Tod A. Grusenmeyer,<sup>a</sup> Jacob M. Artz,<sup>a,e</sup> Christopher L. McCleese,<sup>a</sup> Ryan M. O'Donnell,<sup>c</sup> Thomas M. Cooper,<sup>a</sup> William M. Shensky, III,<sup>c</sup> and Joy E. Haley<sup>\*a</sup>*

<sup>a</sup>Air Force Research Laboratory, Materials and Manufacturing Directorate, Functional Materials Division, Wright-Patterson AFB, Ohio 45433-7750, United States

<sup>b</sup>General Dynamics Information Technology, 5100 Springfield Pike, Dayton, Ohio 45431, United States

<sup>c</sup>U.S. Army Research Laboratory, 2800 Powder Mill Road, Adelphi, Maryland 20783-1138

<sup>d</sup>Department of Physics, United States Air Force Academy, U.S. Air Force Academy, Colorado 80840, United States

<sup>e</sup>Southwestern Ohio Council for Higher Education, Dayton, Ohio 45420, United States

|                                   |    |
|-----------------------------------|----|
| <b>Table of Contents</b>          | S1 |
| <b>List of Figures and Tables</b> | S2 |
| <b>Figures and Tables</b>         | S3 |

## List of Figures and Tables

|                                                                                                                                     |     |
|-------------------------------------------------------------------------------------------------------------------------------------|-----|
| <b>Figure S1.</b> Time-resolved fluorescence decays of <b>1-3</b> and <b>5-7</b> in deaerated toluene                               | S3  |
| <b>Figure S2.</b> Ultrafast transient absorption decay of <b>4</b> in aerated toluene                                               | S4  |
| <b>Figure S3.</b> Ultrafast transient absorption difference spectra of <b>1</b> in toluene, $\lambda_{\text{ex}} = 400$ nm          | S4  |
| <b>Figure S4.</b> Ultrafast transient absorption difference spectra of <b>2</b> in toluene, $\lambda_{\text{ex}} = 400$ nm          | S5  |
| <b>Figure S5.</b> Ultrafast transient absorption difference spectra of <b>3</b> in toluene, $\lambda_{\text{ex}} = 400$ nm          | S5  |
| <b>Figure S6.</b> Ultrafast transient absorption difference spectra of <b>4</b> in toluene, $\lambda_{\text{ex}} = 400$ nm          | S6  |
| <b>Figure S7.</b> Ultrafast transient absorption difference spectra of <b>5</b> in toluene, $\lambda_{\text{ex}} = 400$ nm          | S6  |
| <b>Figure S8.</b> Ultrafast transient absorption difference spectra of <b>6</b> in toluene, $\lambda_{\text{ex}} = 400$ nm          | S7  |
| <b>Figure S9.</b> Ultrafast transient absorption difference spectra of <b>7</b> in toluene, $\lambda_{\text{ex}} = 400$ nm          | S7  |
| <b>Table S1.</b> Ultrafast transient absorption properties in toluene                                                               | S8  |
| <b>Figure S10.</b> Phosphorescence spectra at 77 K in 2:2:1:1 diethyl ether:iodoethane:ethanol:toluene.                             | S8  |
| <b>Figure S11.</b> Delayed fluorescence spectra as a function of laser excitation energy                                            | S9  |
| <b>Figure S12.</b> Normalized delayed integrated fluorescence intensity as a function of incident pulse energy in deaerated toluene | S10 |
| <b>Figure S13.</b> Triplet concentration as a function of time fit to eq 2                                                          | S11 |

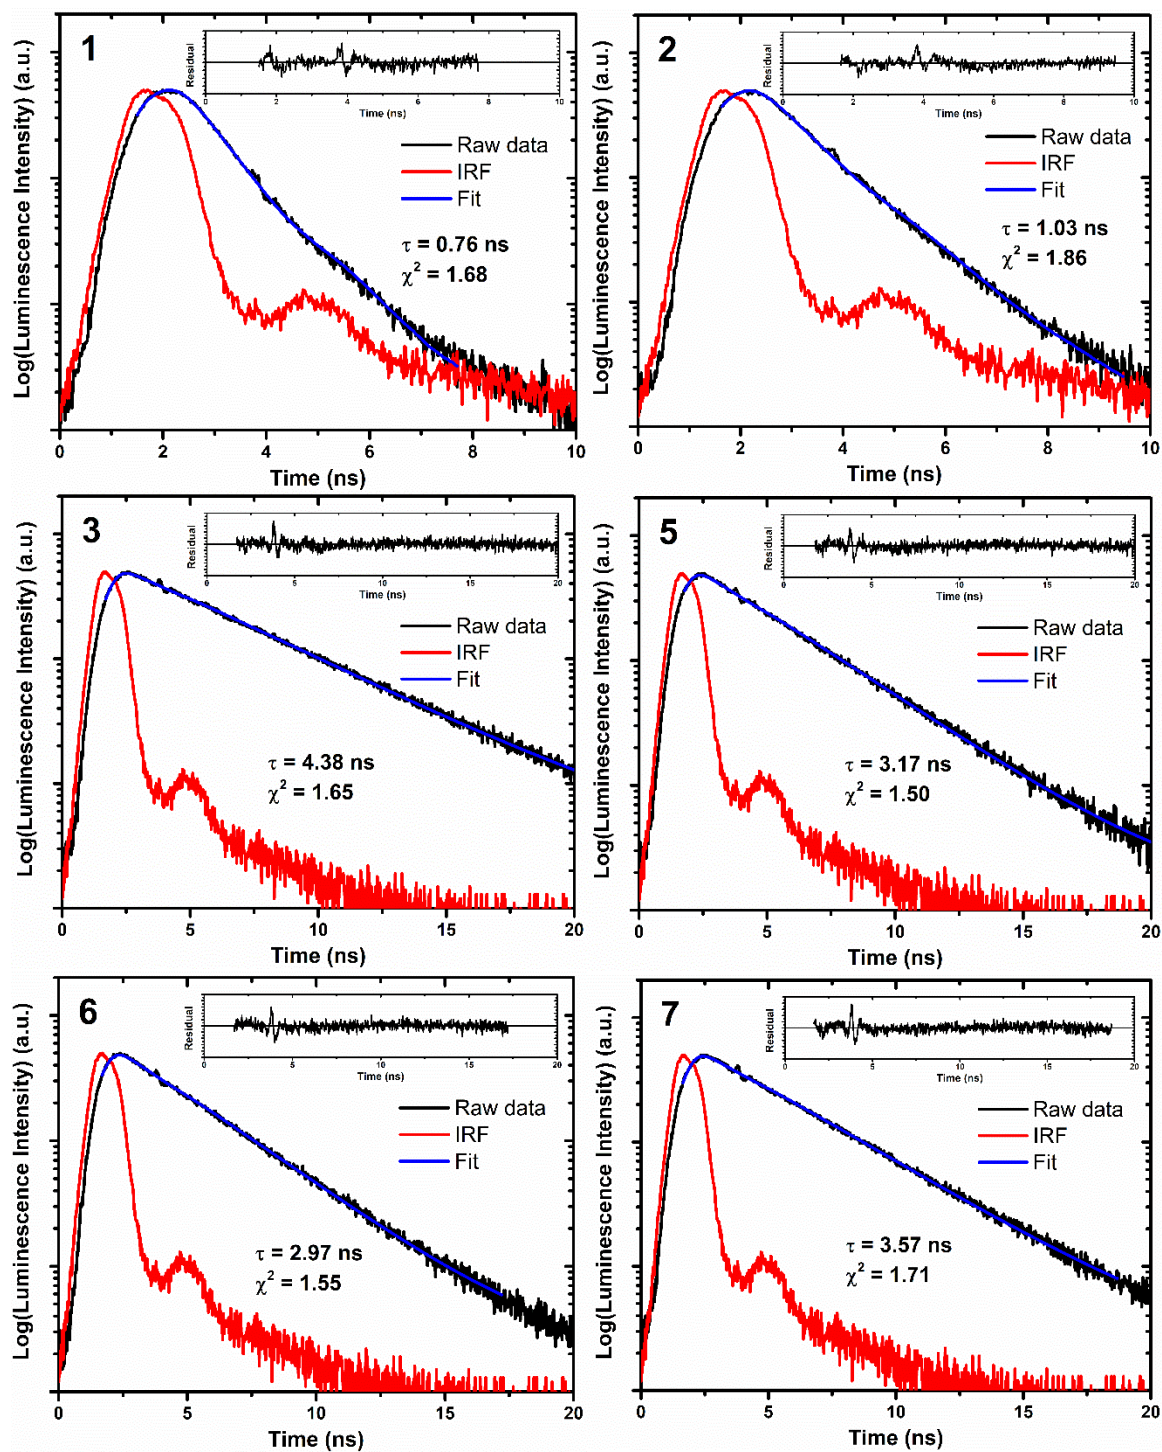

**Figure S1.** Time-resolved fluorescence decays of 1-3 and 5-7 in deaerated toluene.  $\lambda_{\text{ex}} = 404$  nm,  $\lambda_{\text{det}} =$  fluorescence maximum (see Table 1). Raw data (black), instrument response function (IRF, red), and exponential fit (blue) are shown. Inset: residual as a function of time.

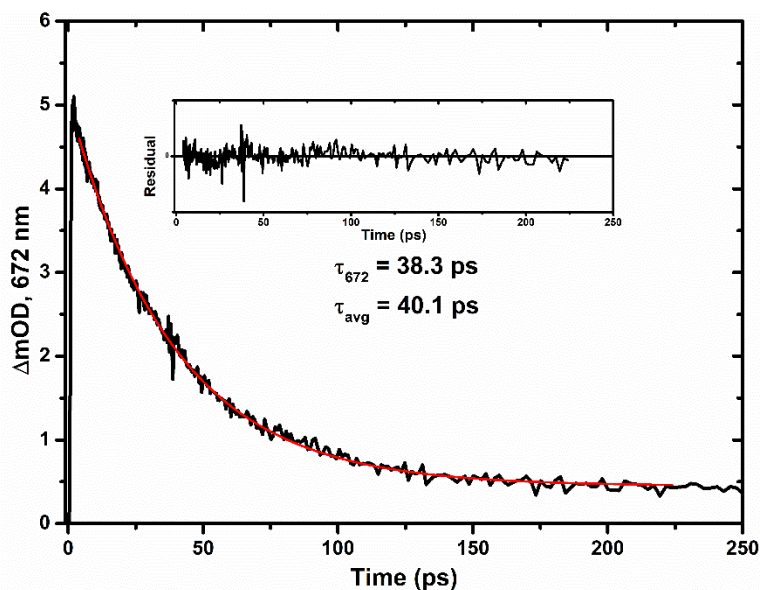

**Figure S2.** Transient absorption decay of **4** in aerated toluene monitored at 672 nm fit to a single exponential decay (red line).  $\lambda_{ex} = 400$  nm. Inset: residual as a function of time.  $\tau_{672}$  is the observed lifetime at 672 nm, while  $\tau_{avg}$  is the average lifetime of seven different individual wavelength fits ranging from 639 – 701 nm.

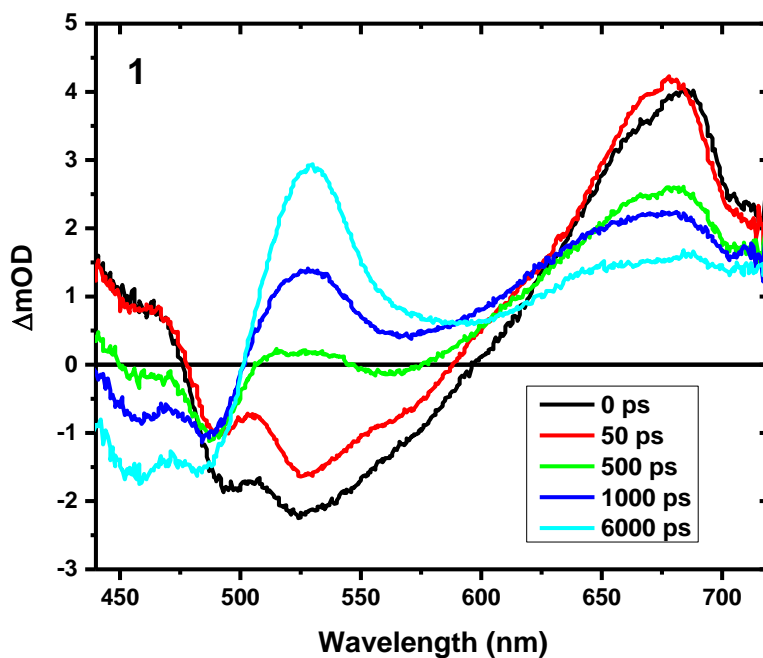

**Figure S3.** Ultrafast transient absorption difference spectra of **1** in toluene,  $\lambda_{ex} = 400$  nm

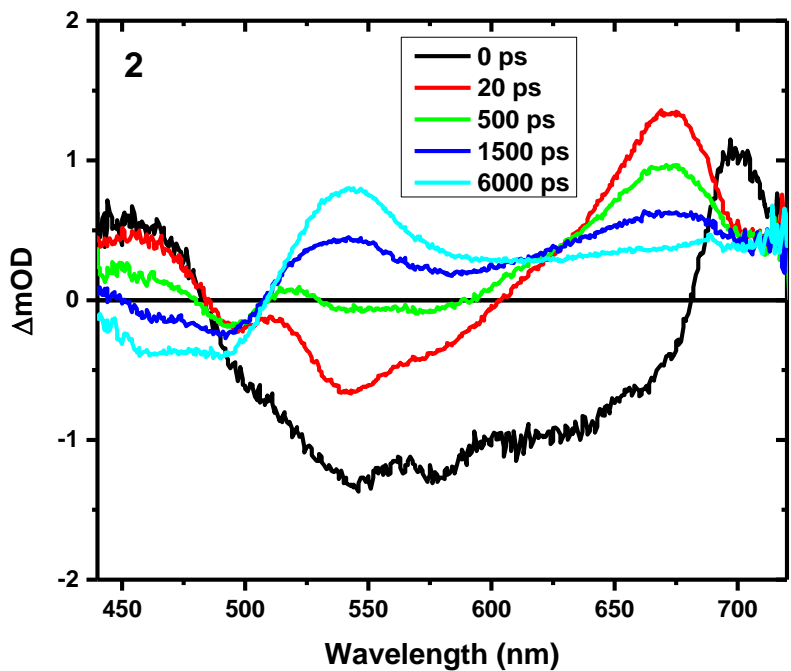

Figure S4. Ultrafast transient absorption difference spectra of **2** in toluene,  $\lambda_{\text{ex}} = 400$  nm

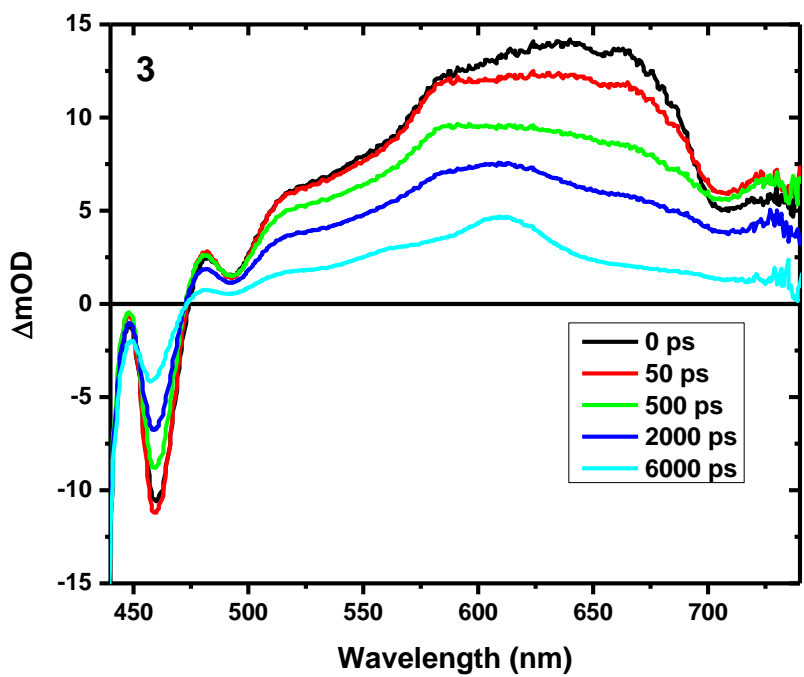

Figure S5. Ultrafast transient absorption difference spectra of **3** in toluene,  $\lambda_{\text{ex}} = 400$  nm

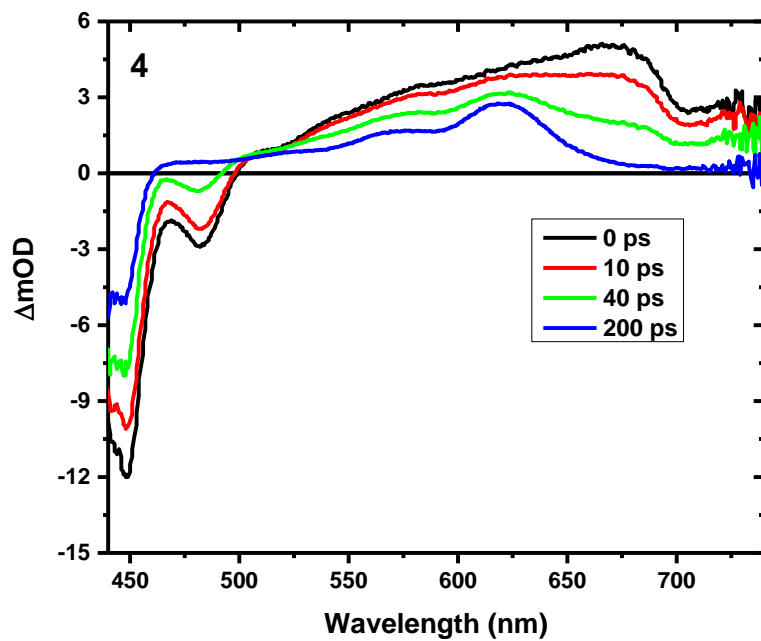

**Figure S6.** Ultrafast transient absorption difference spectra of **4** in toluene,  $\lambda_{\text{ex}} = 400$  nm

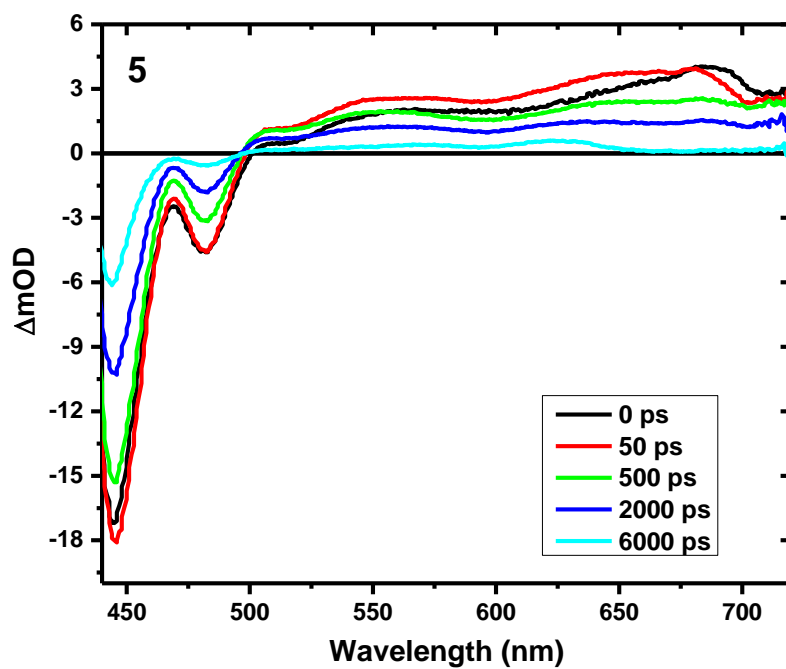

**Figure S7.** Ultrafast transient absorption difference spectra of **5** in toluene,  $\lambda_{\text{ex}} = 400$  nm

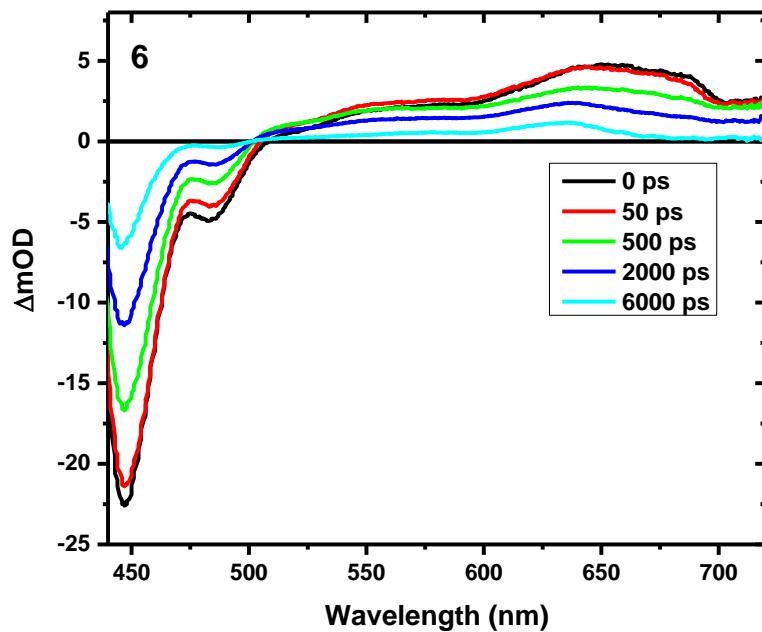

**Figure S8.** Ultrafast transient absorption difference spectra of **6** in toluene,  $\lambda_{\text{ex}} = 400$  nm

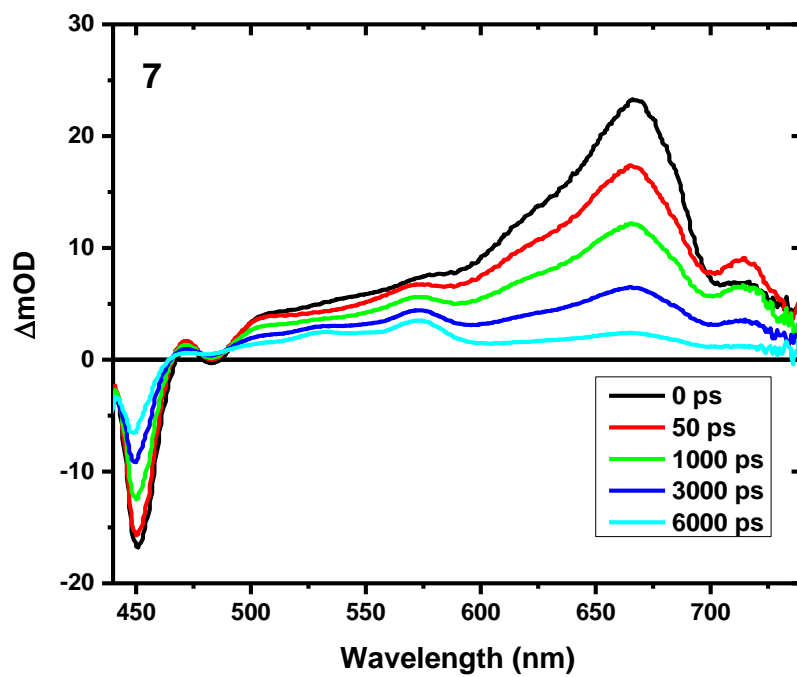

**Figure S9.** Ultrafast transient absorption difference spectra of **7** in toluene,  $\lambda_{\text{ex}} = 400$  nm

**Table S1.** Ultrafast transient absorption properties in toluene.

| Compound | $\lambda_{\text{max}}/\text{nm}, t = 0$ | $\lambda_{\text{max}}/\text{nm}, t = \text{long}^a$ | $\tau_1/\text{ps}$ | $\tau_2/\text{ps}$ |
|----------|-----------------------------------------|-----------------------------------------------------|--------------------|--------------------|
| 1        | 684                                     | 529                                                 | 4.17(2.49)         | 821(122)           |
| 2        | 684                                     | 529                                                 | 5.43(2.05)         | 1090(10)           |
| 3        | 639                                     | 609                                                 | 71.3(5.5)          | 4130(150)          |
| 4        | 669                                     | 619                                                 | 40.1(3.6)          | ---                |
| 5        | 684                                     | 623                                                 | 128(26)            | 3190(350)          |
| 6        | 652                                     | 635                                                 | 262(75)            | 3290(260)          |
| 7        | 667                                     | 573                                                 | 20.9(0.9)          | 3030(30)           |

<sup>a</sup>Taken from the longest time trace for each compound in Figures S3 – S9.

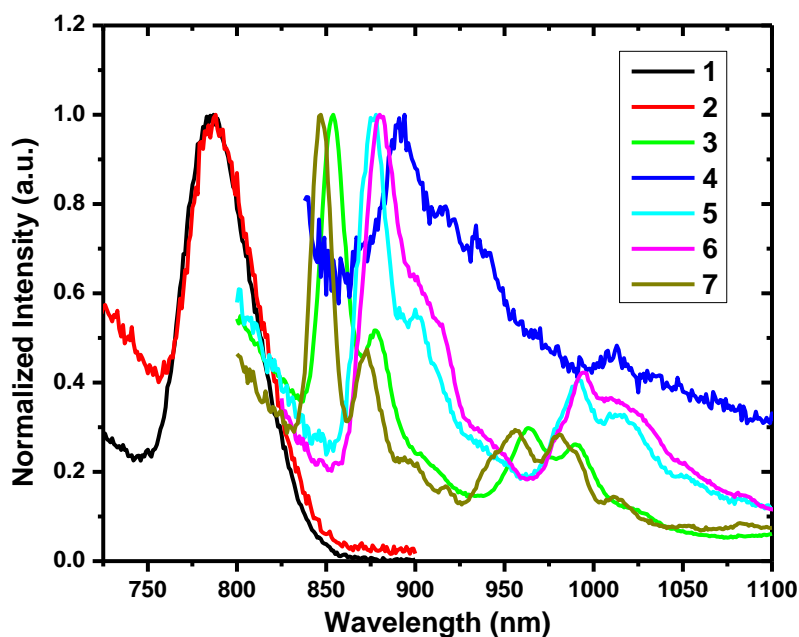

**Figure S10.** Phosphorescence spectra at 77 K in 2:2:1:1 diethyl ether:iodoethane:ethanol:toluene.  $\lambda_{\text{ex}}$  (nm): 1 (500), 2 (500), 3 (423), 4 (459), 5 (454), 6 (459), 7 (409). 1 and 2 were collected on a Cary Eclipse fluorometer (see experimental section in manuscript) using gated delay detection from 100  $\mu\text{s}$  to 5 ms with a 595 nm long-pass filter. 3 – 7 were collected with the NIR PMT from an Edinburgh Instruments FLS980 with a 643 nm long-pass filter.



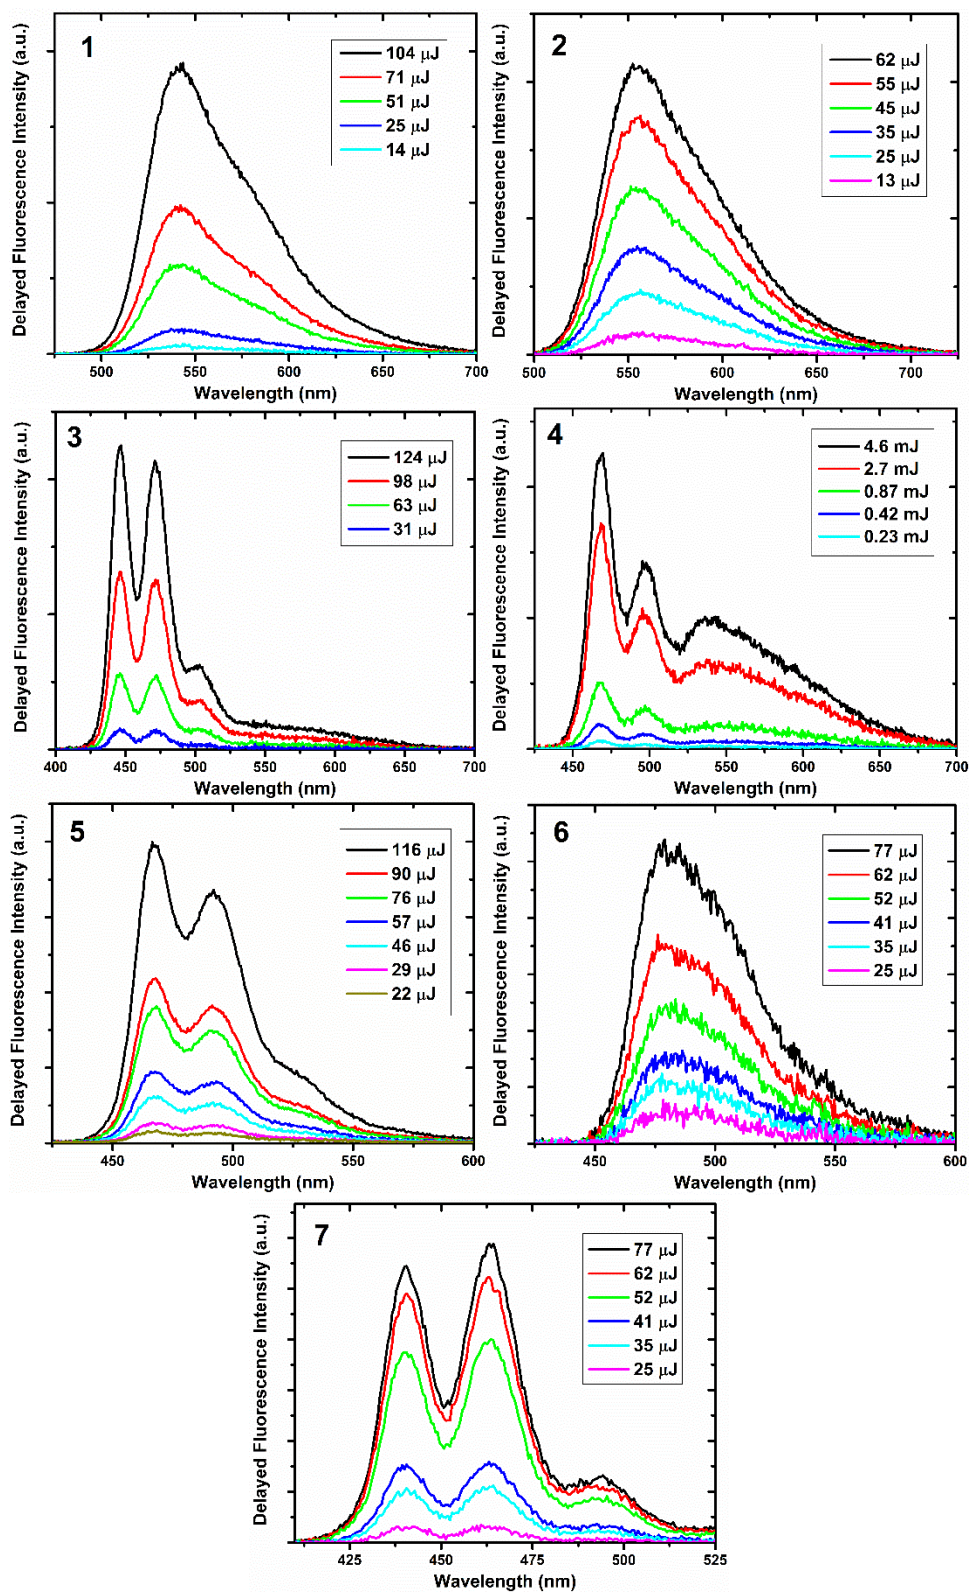

**Figure S11.** Delayed fluorescence spectra at 25 (4) or 50 (1-3, 5-7)  $\mu$ s after excitation as a function of laser excitation energy. Gate widths were 49 (4) or 99 (1-3, 5-7)  $\mu$ s.  $\lambda_{\text{ex}} = 478$  nm (1,2), 422 nm (3), 442 nm (4-6), 418 nm (7)

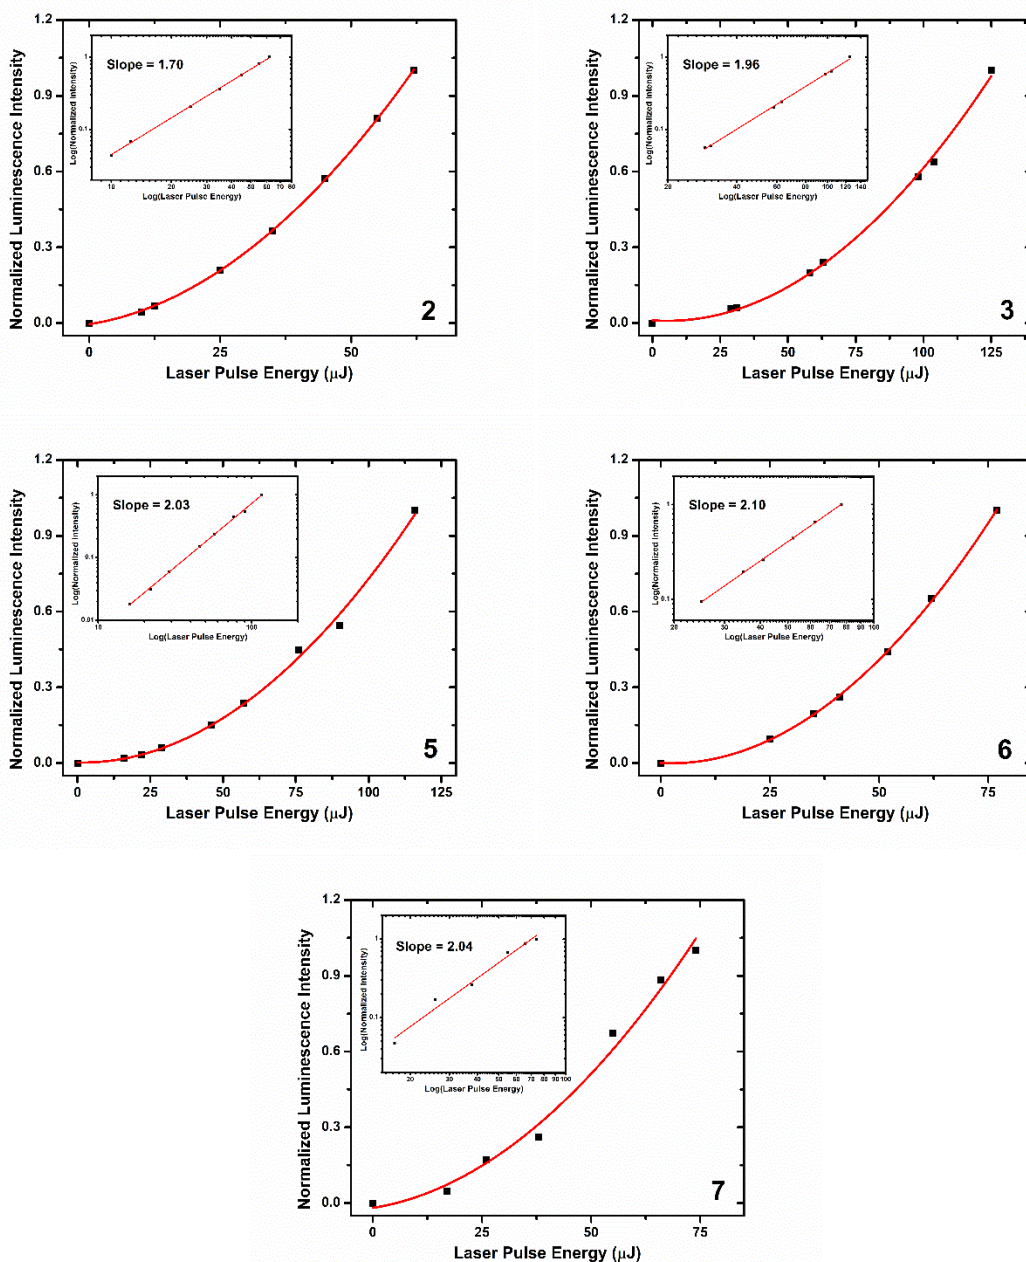

**Figure S12.** Normalized delayed integrated fluorescence intensity as a function of incident pulse energy in deaerated toluene. The data were integrated over the range shown in Figure S11 and normalized to the highest integrated intensity. The solid line is the best quadratic fit. Inset: double logarithm plot of the same data, with slopes listed.

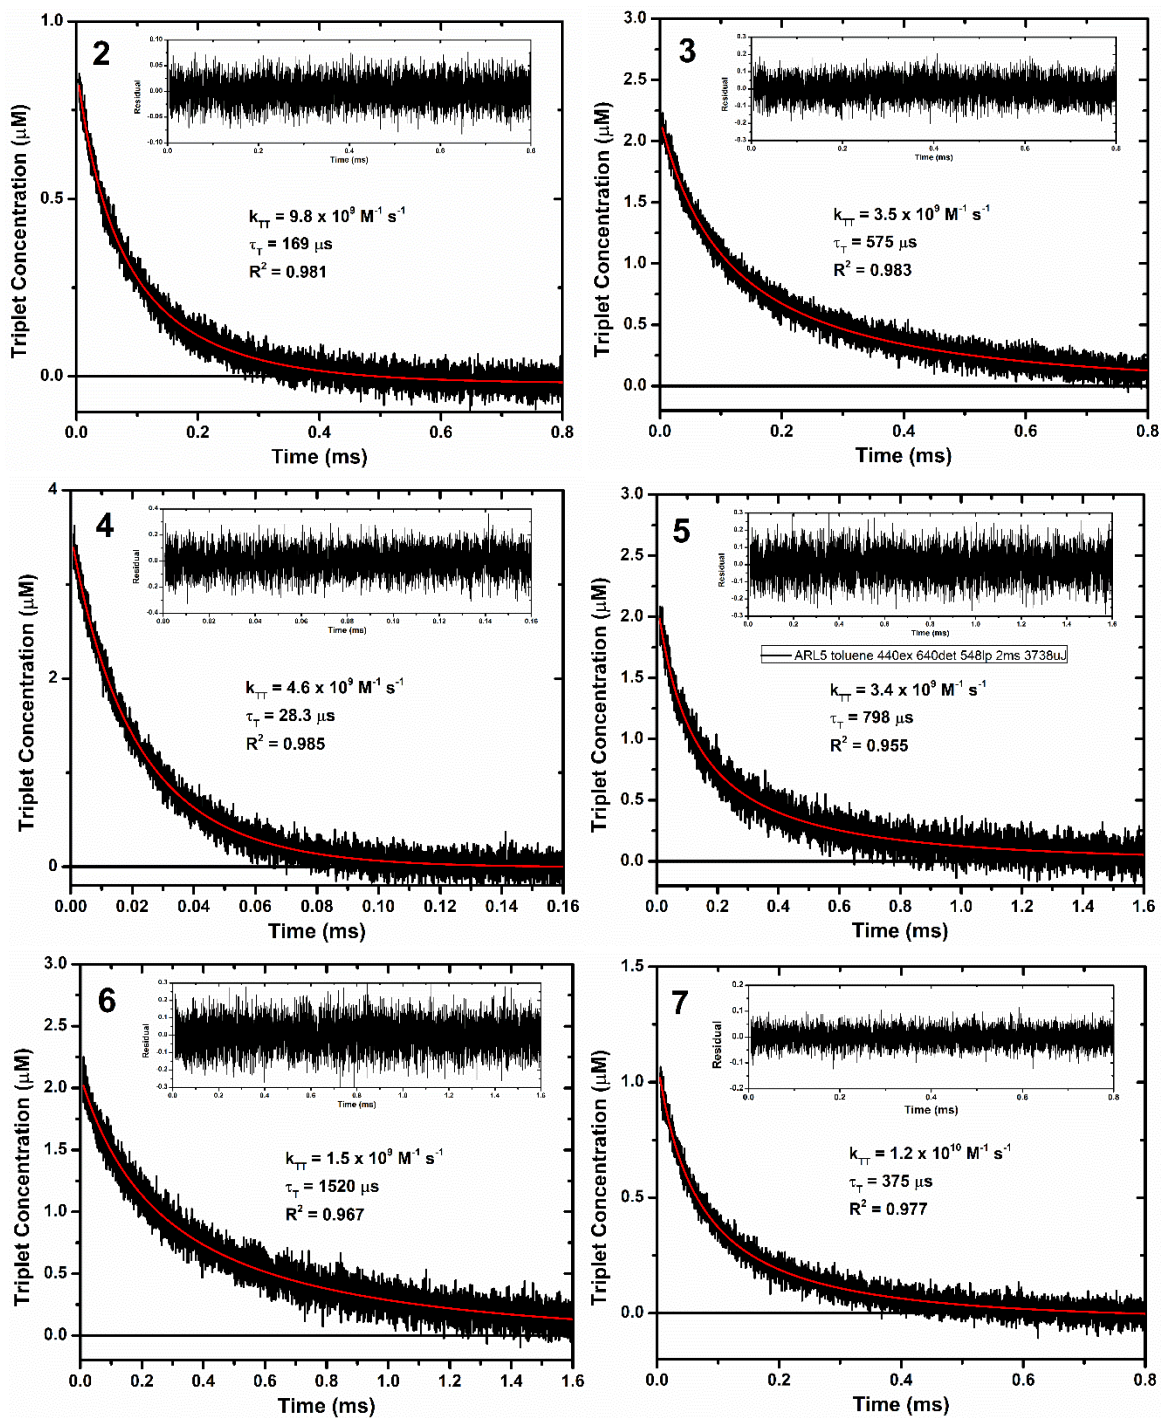

**Figure S13.** Triplet concentration as a function of time fit to eq 2.  $\lambda_{\text{ex}} = 468$  (2), 422 (3), 442 (4), 440 (5), 442 (6), 418 (7);  $\lambda_{\text{det}} = 560$  (2), 623 (3), 633 (4), 640 (5), 646 (6), 585 (7). Insets: residuals as a function of time.
